# Supplementary material for: Bridging the gap between gut microbiota and social life: beyond autism, the case of alcohol use disorder
Source: Research Square preprint supplement (doi:10.21203/rs.3.rs-7206311/v1), 2026-01-05
Supplement: Supplementary file 1 [file f1c3f40e50da3572e79c6eac.docx]

**Supporting Information**

**This PDF file includes:**

Supplemental behavioural results

Figures S1 to S5

Tables S1 to S5

**Supplemental behavioural results**

*Social cognition: visual perspective-taking task*

We used a visual perspective-taking task (VPT) (see Fig. 2A) to investigate whether the dysbiotic subgroup displayed lesser natural tendency to consider spontaneously the perspective of others, as compared to the non-dysbiotic group. A 2 (Congruency: Congruent vs. incongruent perspectives) x 2 (Perspective: Self- vs. other-perspective) x 2 (Group: Dysbiotic vs. Non-Dysbiotic) ANOVA was conducted on the mean reaction times (RT, speed) and on accuracy rates. One patient was excluded from the analyses for outlying performance (accuracy at chance level). The ANOVA revealed a significant main effect of Congruency, F(1, 43) = 19.16, p < 0.001, with a slower RT in the incongruent condition (mean = 1.47s) than in the congruent condition (mean = 1.27s). The analyses showed no significant main effect of Perspective, F(1, 43) < 1, p = 0.82 and a significant Congruency x Perspective interaction, F(1, 43) = 8.89, p=0.005.

Fig. S1.

**
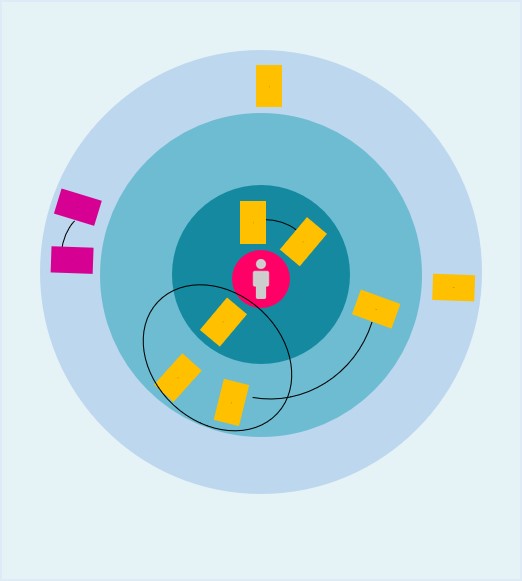
**

Illustration of the sociogram.

The pink circle in the center represents the patient. The different concentric circles represent the different levels of support (from most important [closest to the patient] to least important).

Fig. S2.

Social network composition of Dysbiotic and Non-dysbiotic sAUD patients.

Fig. S3.

Fecal short chain fatty acid level according to Dysbiotic and Non-dysbiotic group. P-values were obtained using Mann-Whitney-Wilcoxon test. Data are expressed as mean ± SEM.


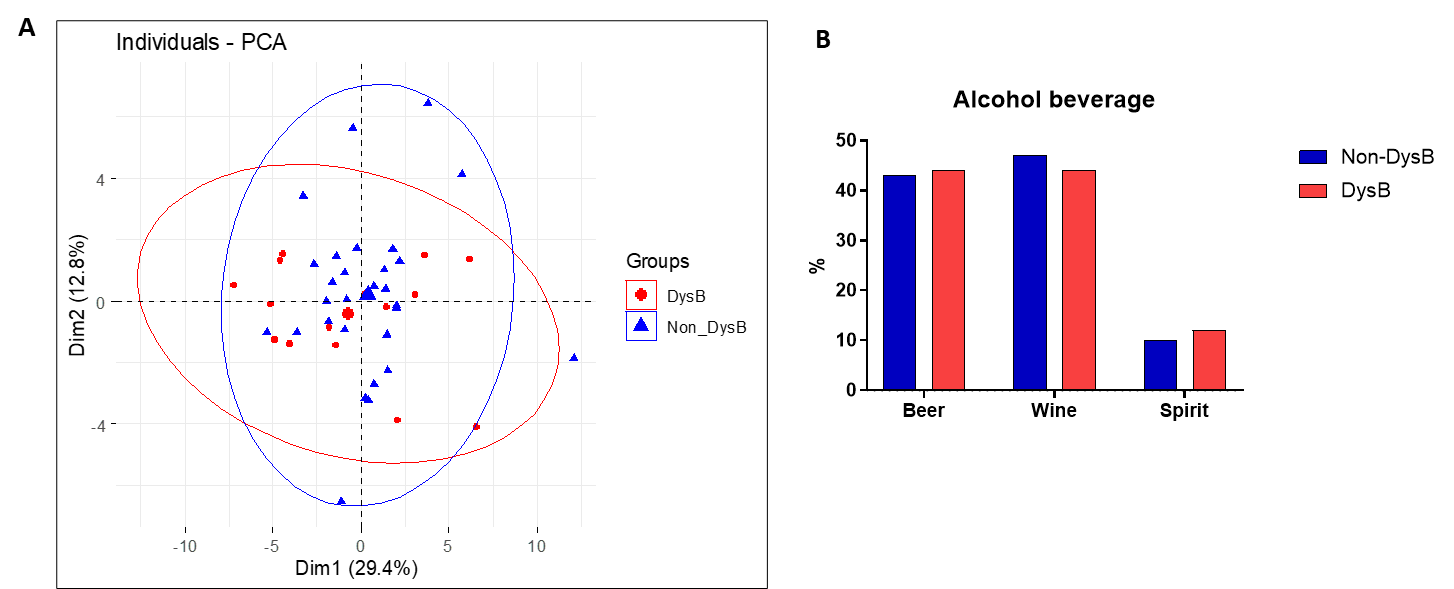
Fig. S4.

**Nutritional habits of dysbiotic and non-dysbiotic sAUD patients. (A)** Principal component analysis (PCA) of macronutrient intake**.** N=46. Individuals are plotted along with confidence ellipses. **(B)** Comparison of the principal types of alcohol beverage consumed according to gut dysbiosis. Alcohol consumption for the week prior to hospitalization was calculated using the time-line follow-back approach.


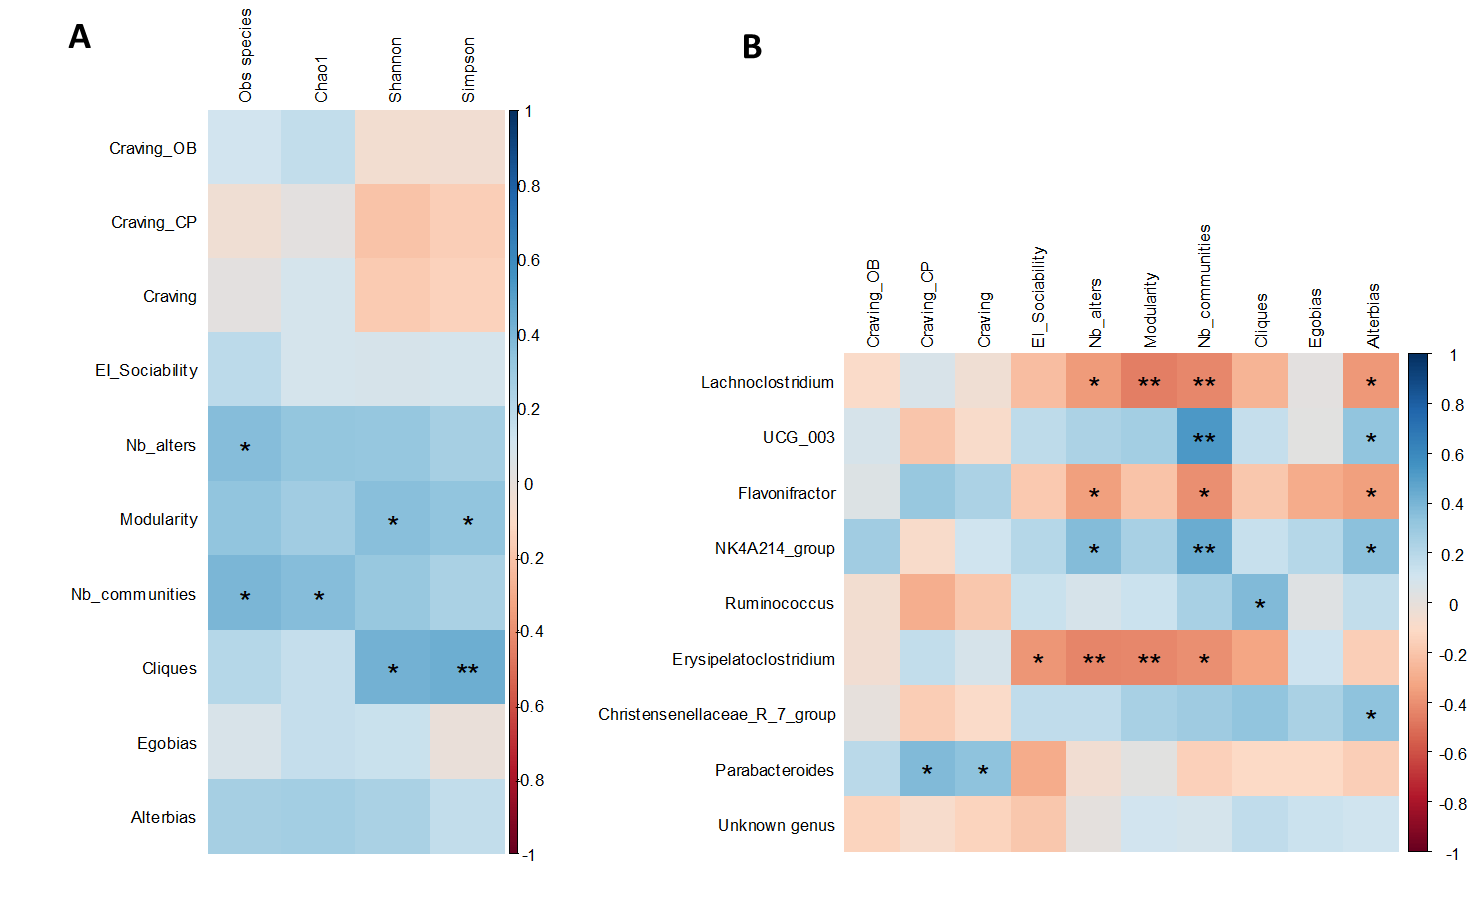
Fig. S5.

Partial correlations between sociability indexes and microbial data. Spearman partial correlations between the sociability indexes and A. α diversity and B. microbial genera which differed between dysbiotic and non dysbiotic AUD subjects. Correlations were adjusted for age, gender, and body mass index. *p<0.05, **p<0.01,***p<0.001. EI, emotional intelligence.

Table S1. Definition of the main measures used to describe the social networks

|  | |
| --- | --- |
|  |  |
|  | **Definition** |
| Density (%) | Proportion of effective ties among all possible ties between alters |
| Network size | Number of alters (network members) supporting ego (the focal service user) |
| Number of dyads | Number of dyads in ego’s network |
| Number of triads | Number of triads in ego’s network |
| Degree | Average number of other alters with which all ego’s alters are in contact |
| Betweenness | Frequency where an alter is a crossing point along the shortest path between two other alters |
| Closeness | Ratio between (n-1) and the distance between pairs of nodes |
| Modularity | Tendency of nodes to cluster |
| Number of communities | Number of communities (linked alters) in the network |
| Diameter | Maximum distance in the graph |
| Transitivity | Percentage of triples that are triads. |
| Professional proportion | Proportion of professional (psychiatrist, nurse, social worker, etc.) among the alters supporting ego |
| Gender homophily | Proportion of gender homophily in the network (link between alters of the same gender) |
| Ring homophily | Circle homophily on the target, i.e. the fact that alters preferentially have links with other alters in the same circle. |
| Isolated | Alter which is not in contact with any other alter in ego’s network |
| Isolated dyads | Number of dyads of two isolated alters (without link to another alter) in the network |
| Number of community with more than 3 alters | Number of communities with more than 3 alters |
| Cliques | Subset of alters that are all connected to each other (maximum density subnetwork) |

Table S2. Biological parameters of sAUD patients according to gut dysbiosis

|  | **Dysbiotic** |  | **Non Dysbiotic** |  | **Model 1b** | |  | **Model 2c** | |
| --- | --- | --- | --- | --- | --- | --- | --- | --- | --- |
| **n=16** | **n=30** |
|  | **Mean± SD** |  | **Mean± SD** | **p a** | **OR** | **p** |  | **OR** | **p** |
| **Liver parameters** |  |  |  |  |  |  |  |  |  |
| AST | 48.6 ± 32.0 |  | 43.1 ± 27.9 | 0.63 | 0.99 [0.99 ; 1.01] | 0.75 |  | 0.99 [0.98 ; 1.001] | 0.96 |
| ALT | 42.3 ± 33.3 |  | 42.0 ± 31.2 | 0.70 | 1.00 [0.99 ; 1.01] | 0.69 |  | 1.00 [0.99 ; 1.01] | 0.92 |
| CK18-M65 | 285.5 ± 172.3 |  | 304.8 ± 193.0 | 0.73 | 1.00 [0.99 ; 1.01] | 0.92 |  | 1.00 [0.99 ; 1.01] | 0.91 |
| FGF-21 | 4284.5 ± 3312.8 |  | 2766.1 ± 2048.3 | 0.11 | 1.00 [0.99 ; 1.01] | 0.1 |  | 1.00 [0.99 ; 1.01] | 0.13 |
| CAP | 262.9 ± 62.9 |  | 278.2 ± 60.3 | 0.43 | 1.00 [0.99 ; 1.02] | 0.64 |  | 1.00 [0.99 ; 1.02] | 0.58 |
| ***Inflammation*** |  |  |  |  |  |  |  |  |  |
| TNFα (ng/ml) | 2.8 ± 1.4 |  | 3.5 ± 2.1 | 0.25 | 0.93 | 0.74 |  | 1.02 | 0.92 |
| [0.61 ; 1.41] | [0.67 ; 1.56] |
| IL-6 (ng/ml) | 3.8 ± 2.2 |  | 5.0 ± 3.3 | 0.22 | 0.94 | 0.70 |  | 0.99 | 0.94 |
| [0.68 ; 1.29] | [0.70 ; 1.39] |
| IL-18 (ng/ml) | 547.0 ± 289.0 |  | 543.1 ± 230.4 | 0.73 | 1.00 | 0.64 |  | 1.00 | 0.69 |
| [0.99 ; 1.00] | [0.99 ; 1.00] |
| IFNy (ng/ml) | 123.4 ± 121.2 |  | 172.4 ± 152.5 | 0.14 | 1.00 | 0.55 |  | 1.00 | 0.98 |
| [0.99 ; 1.00] | [0.99 ; 1.01] |
| IL-8 (ng/ml) | 8.0 ± 5.0 |  | 6.3 ± 3.4 | 0.41 | 1.21 | **0.048** |  | 1.20 | 0.06 |
| [1.01 ; 1.46] | [0.99 ; 1.46] |
| MCP-1 (ng/ml) | 231.9 ± 70.3 |  | 277.2 ± 90.5 | 0.07 | 0.99 | 0.39 |  | 1.00 | 0.57 |
| [0.98 ; 1.01] | [0.98 ; 1.01] |
| IL-10 (ng/ml) | 1.8 ± 1.3 |  | 2.0 ± 1.3 | 0.62 | 1.06 | 0.85 |  | 1.41 | 0.36 |
| [0.56 ; 2.01] | [0.67 ; 2.98] |
| ***Growth factor*** |  |  |  |  |  |  |  |  |  |
| BDNF (ng/ml) | 38.7 ± 16.1 |  | 43.7 ± 25.4 | 0.84 | 0.98 | 0.40 |  | 0.98 | 0.42 |
| [0.95 ; 1.02] | [0.95 ; 1.02] |

a p values were calculated using a T-test or Mann Whitney Wilcoxon's test.

b Logistic regression adjusted for age, gender and body mass index

c Logistic regression adjusted for age, gender, body mass index and nutritional intakes

Table S3. Energy and nutritional intake and circulating nutrients of sAUD patients according to gut dysbiosis

|  | **Dysbiotic patients n=16** |  | **Non Dysbiotic patients n=30** | **pa** | **Model 1b** | | **Model 2c** | |
| --- | --- | --- | --- | --- | --- | --- | --- | --- |
|  | **Mean± SD** |  | **Mean± SD** | **OR** | **P** | **OR** | **P** |
| **Energy intake (Kcal/d)** | 2396.6 ± 989.6 |  | 2343.0 ± 623.2 | 0.50 | 1.00 | 0.29 | - | - |
| [0.99 ; 1.01] |  |
| **Macronutrients (g/d)** |  |  |  |  |  |  |  |  |
| Alcohol | 133.6 ± 78.6 |  | 124 ± 51.3 | 0.78 | 1.01 | 0.11 | 1.01 | 0.21 |
| [0.99 ; 1.03] | [0.99 ; 1.04] |
| Protein | 57.6 ± 20.2 |  | 67.5 ± 19.8 | 0.11 | 0.96 | 0.09 | 0.93 | **0.03** |
| [0.91 ; 1.01] | [0.89 ; 1.01] |
| Carbohydrates | 201 ± 113.9 |  | 188.9 ± 98.2 | 0.62 | 1.00 | 0.69 | 1.00 | 0.59 |
| [0.99 ; 1.01] | [0.99 ; 1.01] |
| Added suggar | 114.1 ± 87.9 |  | 103.4 ± 82.7 | 0.83 | 1.00 | 0.78 | 1.00 | 0.67 |
| [0.99 ; 1.01] | [0.98 ; 1.01] |
| Fats | 47.5 ± 31.1 |  | 49.9 ± 20.5 | 0.50 | 0.99 | 0.68 | 0.98 | 0.41 |
| [0.96 ; 1.02] | [0.95 ; 1.02] |
| Cholesterol | 135.4 ± 76.4 |  | 189.0 ± 103.0 | 0.07 | 0.99 | 0.07 | 0.99 | 0.06 |
| [0.98 ; 1.01] | [0.98 ; 1.00] |
| Ratio n6/n3 | 7.7 ± 5.6 |  | 6.1 ± 4 | 0.30 | 1.06 | 0.47 | 1.07 | 0.41 |
| [0.90 ; 1.24] | [0.91 ; 1.27] |
| **Fiber intake** |  |  |  |  |  |  |  |  |
| Total DF (g/d) | 10.8 ± 8.3 |  | 14.2 ± 7.8 | 0.11 | 0.92 | 0.16 | 0.84 | 0.05 |
| [0.82 ; 1.03] | [0.69 ; 0.98] |
| Insoluble DF (g/d) | 5.5 ± 4 |  | 7.3 ± 4.8 | 0.13 | 0.86 | 0.16 | 0.76 | 0.06 |
| [0.70 ; 1.06] | [0.53 ; 1.01] |
| Soluble DF (g/d) | 3.2 ± 2.1 |  | 4.1 ± 2.4 | 0.33 | 0.75 | 0.16 | 0.57 | 0.07 |
| [0.50 ; 1.12] | [0.24 ; 0.98] |
| FOS (g/d) | 0.97 ± 1.03 |  | 0.92 ± 0.97 | 0.92 | 1.24 | 0.60 | 1.04 | 0.92 |
| [0.55; 2.78] | [0.40; 2,56] |
| GOS (g/d) | 0.24 ± 0.49 |  | 0.21 ± 0.29 | 0.40 | 2.82 | 0.35 | 2.05 | 0.57 |
| [0.92; 1.06] | [0.19; 31,51] |
| **Transformed food** |  |  |  |  |  |  |  |  |
| NOVA score | 2.3 ± 0.8 |  | 2 ± 0.7 | 0.25 | 1.43 | 0.53 | 1.54 | 0.46 |
| [0.47; 4.39] | [0.49; 5,09] |
| TF | 14.3 ± 12.9 |  | 14.5 ± 11.2 | 0.75 | 0.99 | 0.5 | 0.99 | 0.29 |
| [0.99; 1.00] | [0.99; 1.00] |
| UTF | 33.9 ± 24.5 |  | 24.2 ± 21.1 | 0.17 | 0.99 | 0.29 | 1.01 | 0.78 |
| [0.98; 1.05] | [0.96; 1.06] |
| **Micronutrients** |  |  |  |  |  |  |  |  |
| Sodium (g/d) | 1968 ± 1105 |  | 2097 ± 760 | 0.52 | 0.99 [0.99 ; 1.00] | 0.3 | 0.99 [0.99 ; 1.00] | 0.12 |
| Potassium (g/d) | 2739 ± 1410 |  | 2969 ± 968 | 0.49 | 0.99 [0.99 ; 1.00] | 0.93 | 0.99 [0.99 ; 1.00] | 0.54 |
| Calcium (mg/d) | 760 ± 468 |  | 715. ± 439 | 0.64 | 1.00 [0.99 ; 1.00] | 0.82 | 1.00 [0.99 ; 1.00] | 0.76 |
| Phosphorus (g/d) | 1177 ± 625 |  | 1163 ± 44 | 0.70 | 1.00 [0.99 ; 1.00] | 0.85 | 1.00 [0.99 ; 1.01] | 0.6 |
| Magnesium (mg/d) | 300 ± 130 |  | 309 ± 105 | 0.94 | 1.00 [0.99 ; 1.01] | 0.78 | 1.00 [0.98 ; 1.01] | 0.59 |
| Iron (mg/d) | 9.40 ± 5.10 |  | 13.44 ± 7.12 | 0.04 | 0.91 [0.78 ; 1.05] | 0.23 | 0.89 [0.75 ; 1.03] | 0.15 |
| Copper (mg/d) | 0.63 ± 0.41 |  | 1.00 ± 0.71 | 0.09 | 0.20 [0.01 ; 1.31] | 0.15 | 0.08 [0.002 ; 0.75] | 0.07 |
| Zinc (mg/d) | 9.37 ± 4.05 |  | 8.94 ± 3.69 | 0.98 | 1.05 [0.86 ; 1.31] | 0.63 | 1.02 [0.82 ; 1.28] | 0.87 |
| Selenium (µg/d) | 66.94 ± 47.53 |  | 61.39 ± 33.68 | 0.98 | 0.99 [0.97 ; 1.02] | 0.78 | 0.99 [0.97 ; 1.01] | 0.54 |
| Vit. B1 (mg/d) | 1.19 ± 1.03 |  | 1.12 ± 0.65 | 0.61 | 0.94 [0.36 ; 2.48] | 0.89 | 0.79 [0.28 ; 2.17] | 0.63 |
| Vit. B2 (mg/d) | 1.27 ± 0.81 |  | 1.83 ± 2.24 | 0.39 | 0.53 [0.16 ; 1.20] | 0.2 | 0.36 [0.06 ; 1.04] | 0.15 |
| Vit. B12 (µg/d) | 2.57 ± 1.35 |  | 3.70 ± 2.49 | 0.12 | 0.58 [0.33 ; 0.92] | 0.03 | 0.55 [0.31 ; 0.87] | 0.02 |
| Folates (µg/d) | 216 ± 177 |  | 223 ± 119 | 0.46 | 0.99 [0.99 ; 1.01] | 0.89 | 0.99 [0.98 ; 1.01] | 0.43 |
| Vit. C (mg/d) | 61.9 ± 71.3 |  | 90.3 ± 93.9 | 0.31 | 0.98 [0.97 ; 1.00] | 0.06 | 0.98 [0.97 ; 1.00] | 0.06 |
| Vit. D (µg/d) | 1.67 ± 1.41 |  | 3.37 ± 4.72 | 0.38 | 0.71 [0.39 ; 0.96] | 0.17 | 0.71 [0.39 ; 0.96] | 0.17 |
| Vit. E (mg/d) | 6.21 ± 9.43 |  | 7.67 ± 5.93 | 0.09 | 0.97  [0.85 ; 1.08] | 0.64 | 0.97 [0.84 ; 1.07] | 0.56 |
| **Serum nutrients** |  |  |  |  |  |  |  |  |
| β carotene | 74.3 ± 22.0 |  | 108.4 ± 48.4 | 0.03 | 0.95  [0.89 ; 0.98] | 0.02 | 0.94  [0.87 ; 0.98] | 0.03 |
| Folates | 5.9 ± 4.8 |  | 9.4 ± 8.1 | 0.02 | 0.81 [0.65 ; 0.95] | 0.02 | 0.80 [0.64 ; 0.95] | 0.02 |
| B12 vitamin | 586.6 ± 265.6 |  | 513.8 ± 215.1 | 0.35 | 1.00  [0.99 ; 1.01] | 0.76 | 1.00  [0.99 ; 1.01] | 0.75 |
| Phosphorus | 1.03 ± 0.9 |  | 1.02 ± 0.3 | 0.4 | 0.89 [0.02 ; 34.95] | 0.95 | 1.48 [0.03 ; 80.05] | 0.83 |
| Zinc | 78.7 ± 13.31 |  | 76.2 ± 15.3 | 0.72 | 1.00 [0.95 ; 1.06] | 0.87 | 1.00 [0.95 ; 1.06] | 0.9 |
| Sodium | 140.8 ± 2.8 |  | 140.3 ± 2.3 | 0.69 | 1.03 [0.77 ; 1.40] | 0.83 | 1.10 [0.80 ; 1.55] | 0.57 |
| Potassium | 3.9 ± 0.3 |  | 4.0 ± 0.2 | 0.72 | 0.72 [0.04 ; 12.44] | 0.82 | 0.45 [0.02 ; 8.98] | 0.61 |
| Albumin | 46.0 ± 2.4 |  | 47.0 ± 3.0 | 0.35 | 0.85  [0.62 ; 1.13] | 0.3 | 0.82 [0.57 ; 1.11] | 0.22 |

a p values were calculated using a T-test or Mann Whitney Wilcoxon's

b Logistic regression adjusted for age, gender and BMI

c Logistic regression adjusted for age, gender, BMI and energy intake.

sAUD: alcohol use disorder; DF: dietary fiber; FOS: fructo-oligosaccharide; GOS: galacto-oligosaccharide; TF: transformed food; UTF: ultra-transformed food

Table S4. Description of medication use according to gut dysbiosis

|  | **Dysbiotic n=16** |  | **Non Dysbiotic n=30** |  |
| --- | --- | --- | --- | --- |
|  | **n (%)** |  | **n (%)** | **p** |
| Anxiolytics | 5 (31.3) |  | 7 (23.3) | 0.73 |
| Antidepressants | 4 (25.0) |  | 12 (40.0) | 0.31 |
| Neuroleptics | 0 (0.0) |  | 6 (20.0) | 0.08 |
| Hypnotics | 2 (12.5) |  | 2 (6.7) | 0.60 |
| Antihypertensives drugs | 1 (6.3) |  | 6 (20.0) | 0.39 |
| Beta-blockers | 1 (6.3) |  | 0 (0.0) | 0.35 |
| Hypolipidemic drugs | 0 (0.0) |  | 4 (13.3) | 0.28 |
| Myorelaxants | 1 (6.3) |  | 2 (6.7) | 1.00 |
| Proton pump inhibitors | 2 (12.5) |  | 7 (23.3) | 0.46 |
| Alcohol withdrawal | 1 (6.3) |  | 3 (10.0) | 1.00 |

p values were calculated using Fisher's test

**Table S5. Partial correlations between faecal and plasma metabolome and sociability indices**

|  | EI_Sociability | | Nb_alters | | modularity | | nb_communities | | cliques | | Alterbias_index | |
| --- | --- | --- | --- | --- | --- | --- | --- | --- | --- | --- | --- | --- |
| Feacal Metabolites | r | p | r | p | r | p | r | p | r | p | r | p |
| CDCA | -0.166 | 0.342 | -0.111 | 0.524 | -0.152 | 0.383 | -0.160 | 0.358 | -0.246 | 0.155 | -0.409 | 0.01 |
| 4-Trimethylammoniobutanoic acid | -0.153 | 0.381 | -0.028 | 0.873 | 0.129 | 0.461 | -0.081 | 0.645 | 0.186 | 0.284 | -0.059 | 0.738 |
| N8-Acetylspermidine | -0.057 | 0.744 | 0.262 | 0.128 | 0.078 | 0.654 | 0.049 | 0.781 | -0.078 | 0.658 | -0.098 | 0.574 |
| HKDCA | -0.233 | 0.177 | 0.182 | 0.295 | 0.148 | 0.396 | 0.259 | 0.133 | 0.223 | 0.197 | -0.072 | 0.682 |
| L-Carnitine | -0.236 | 0.172 | 0.001 | 0.997 | 0.127 | 0.468 | -0.065 | 0.712 | 0.281 | 0.102 | -0.083 | 0.635 |
| Leucine-Proline | -0.281 | 0.102 | -0.424 | 0.011 | -0.200 | 0.250 | -0.345 | 0.043 | -0.132 | 0.449 | -0.013 | 0.939 |
| Cholic acid | -0.352 | 0.038 | 0.039 | 0.826 | 0.070 | 0.690 | -0.057 | 0.743 | 0.132 | 0.448 | -0.126 | 0.472 |
| LPC 16:0 | -0.034 | 0.844 | -0.084 | 0.630 | -0.241 | 0.163 | -0.053 | 0.762 | -0.406 | 0.016 | -0.378 | 0.025 |
| Stercobilin | -0.021 | 0.904 | 0.269 | 0.118 | 0.290 | 0.091 | 0.282 | 0.101 | 0.304 | 0.076 | 0.116 | 0.509 |
| Choline | -0.126 | 0.471 | 0.042 | 0.809 | -0.134 | 0.443 | -0.046 | 0.794 | -0.160 | 0.357 | -0.276 | 0.109 |
| Urobilin | 0.093 | 0.595 | -0.058 | 0.740 | -0.186 | 0.286 | -0.139 | 0.425 | -0.311 | 0.069 | -0.154 | 0.376 |
| N-Methyl-2-pyrrolidone | -0.561 | 0.0004 | -0.087 | 0.620 | -0.011 | 0.948 | -0.255 | 0.140 | -0.014 | 0.938 | -0.056 | 0.748 |
| Methylimidazoleacetic acid | 0.003 | 0.987 | 0.258 | 0.135 | 0.176 | 0.313 | 0.315 | 0.066 | 0.129 | 0.461 | 0.131 | 0.455 |
| Tryptophan | -0.017 | 0.924 | 0.042 | 0.810 | -0.100 | 0.569 | -0.078 | 0.656 | -0.177 | 0.310 | -0.565 | 0.0004 |
| C6H11NO | -0.059 | 0.737 | 0.180 | 0.302 | 0.042 | 0.813 | 0.084 | 0.633 | -0.108 | 0.537 | -0.264 | 0.126 |
| Blood metabolites | r | p | r | p | r | p | r | p | r | p | r | p |
| Venlafaxine | 0.128 | 0.464 | -0.042 | 0.809 | 0.062 | 0.724 | -0.208 | 0.230 | 0.211 | 0.225 | -0.214 | 0.216 |
| C29H50O4 | 0.199 | 0.252 | 0.159 | 0.361 | 0.220 | 0.204 | 0.207 | 0.234 | 0.332 | 0.052 | 0.135 | 0.438 |
| Creatinine | 0.047 | 0.789 | -0.083 | 0.637 | -0.184 | 0.290 | 0.007 | 0.967 | -0.021 | 0.905 | 0.094 | 0.591 |
| GCDCA | 0.055 | 0.755 | 0.097 | 0.580 | -0.072 | 0.679 | -0.001 | 0.998 | 0.111 | 0.524 | -0.249 | 0.149 |
| GCA | 0.084 | 0.631 | 0.051 | 0.769 | -0.143 | 0.413 | 0.006 | 0.974 | 0.055 | 0.755 | -0.214 | 0.217 |
| Paraxanthine | -0.280 | 0.103 | -0.198 | 0.255 | -0.220 | 0.205 | -0.101 | 0.564 | -0.163 | 0.348 | 0.304 | 0.076 |
| GHDCA | -0.096 | 0.584 | -0.145 | 0.407 | -0.260 | 0.131 | -0.167 | 0.336 | -0.064 | 0.714 | -0.216 | 0.212 |
| PC 36:5 | 0.218 | 0.208 | 0.324 | 0.058 | 0.317 | 0.064 | 0.350 | 0.039 | 0.251 | 0.146 | -0.173 | 0.321 |
| PC 34:1 | 0.142 | 0.416 | 0.169 | 0.331 | 0.013 | 0.942 | 0.066 | 0.707 | 0.053 | 0.762 | -0.434 | 0.009 |
| LPC 16:1 | -0.112 | 0.523 | 0.064 | 0.717 | 0.005 | 0.980 | 0.132 | 0.450 | 0.126 | 0.471 | -0.549 | 0.001 |
| PAG | -0.119 | 0.495 | 0.102 | 0.561 | 0.073 | 0.675 | 0.104 | 0.551 | 0.098 | 0.576 | 0.238 | 0.169 |
| p-Cresol sulfate | -0.153 | 0.381 | 0.072 | 0.682 | 0.050 | 0.774 | 0.134 | 0.442 | 0.152 | 0.385 | 0.297 | 0.083 |
| PC 38:6 | 0.102 | 0.559 | 0.414 | 0.013 | 0.259 | 0.133 | 0.433 | 0.009 | -0.017 | 0.925 | -0.003 | 0.988 |
| CMPF | 0.090 | 0.606 | 0.404 | 0.016 | 0.231 | 0.183 | 0.548 | 0.001 | 0.030 | 0.862 | -0.022 | 0.901 |
| 3-CMPFP | 0.092 | 0.599 | 0.178 | 0.307 | 0.169 | 0.333 | 0.404 | 0.016 | 0.014 | 0.938 | 0.033 | 0.852 |
| LPC 18:1 | -0.161 | 0.355 | 0.003 | 0.987 | -0.153 | 0.379 | 0.035 | 0.840 | -0.101 | 0.565 | -0.116 | 0.507 |
| PC 38:4 | -0.050 | 0.775 | -0.141 | 0.418 | -0.063 | 0.717 | -0.126 | 0.470 | 0.033 | 0.851 | -0.140 | 0.423 |
| PC 36:3 | 0.043 | 0.808 | -0.005 | 0.979 | 0.099 | 0.571 | 0.021 | 0.906 | 0.064 | 0.716 | -0.148 | 0.396 |
| PC 34:3 | 0.019 | 0.914 | 0.275 | 0.110 | 0.266 | 0.123 | 0.128 | 0.465 | 0.313 | 0.067 | -0.270 | 0.116 |
| PC 38:5 | 0.059 | 0.736 | -0.192 | 0.269 | -0.004 | 0.982 | -0.181 | 0.298 | -0.074 | 0.672 | -0.137 | 0.433 |
| Proline betaine | 0.042 | 0.809 | 0.182 | 0.295 | 0.232 | 0.179 | -0.027 | 0.879 | 0.355 | 0.036 | 0.148 | 0.396 |
| Androsterone sulfate | 0.463 | 0.005 | 0.069 | 0.695 | 0.063 | 0.718 | 0.154 | 0.378 | -0.083 | 0.634 | 0.157 | 0.367 |
| LPC 18:2 | 0.125 | 0.473 | 0.133 | 0.447 | 0.156 | 0.369 | 0.239 | 0.166 | 0.099 | 0.572 | 0.086 | 0.622 |
| LPE 20:4 | 0.037 | 0.834 | 0.169 | 0.332 | -0.022 | 0.900 | 0.111 | 0.525 | 0.052 | 0.767 | -0.220 | 0.205 |
| Kynurenine | 0.176 | 0.311 | -0.076 | 0.663 | -0.097 | 0.579 | 0.149 | 0.394 | -0.010 | 0.956 | -0.009 | 0.959 |
| LPE 18:2 | 0.000 | 0.998 | 0.155 | 0.374 | 0.006 | 0.971 | 0.223 | 0.198 | 0.052 | 0.766 | -0.170 | 0.329 |
| Pantoprazole | 0.113 | 0.519 | -0.162 | 0.352 | -0.233 | 0.179 | -0.217 | 0.211 | -0.058 | 0.743 | -0.242 | 0.161 |
| p-Acetamidophenyl glucuronide | 0.073 | 0.676 | -0.036 | 0.836 | 0.010 | 0.956 | -0.012 | 0.944 | 0.151 | 0.386 | -0.172 | 0.322 |
| FA 18:1 | -0.209 | 0.228 | -0.007 | 0.970 | -0.111 | 0.525 | -0.133 | 0.445 | -0.097 | 0.578 | -0.090 | 0.608 |
| LPE 22:5 | 0.052 | 0.767 | 0.269 | 0.119 | 0.173 | 0.321 | 0.191 | 0.273 | 0.214 | 0.218 | -0.528 | 0.001 |
| FA 20:3 | -0.174 | 0.318 | 0.007 | 0.967 | -0.067 | 0.702 | -0.079 | 0.653 | -0.048 | 0.783 | -0.132 | 0.449 |
| FA 16:0 | 0.125 | 0.473 | 0.099 | 0.572 | 0.052 | 0.767 | -0.111 | 0.526 | -0.096 | 0.585 | -0.034 | 0.848 |
| C27H50O2 | 0.061 | 0.727 | -0.091 | 0.604 | 0.017 | 0.922 | 0.117 | 0.502 | -0.013 | 0.941 | 0.058 | 0.740 |
| b-Hydroxycaprylic acid | -0.178 | 0.306 | -0.018 | 0.917 | -0.190 | 0.274 | -0.026 | 0.881 | 0.133 | 0.446 | 0.073 | 0.677 |
| LPC 22:4 | -0.006 | 0.974 | 0.103 | 0.556 | 0.081 | 0.643 | 0.066 | 0.707 | 0.068 | 0.700 | 0.106 | 0.546 |
| FA 16:1 | 0.194 | 0.265 | 0.236 | 0.172 | 0.141 | 0.420 | 0.080 | 0.647 | 0.189 | 0.276 | -0.024 | 0.889 |
| C26H43NO8S | 0.014 | 0.938 | 0.010 | 0.953 | -0.187 | 0.283 | 0.001 | 0.994 | 0.027 | 0.877 | -0.287 | 0.095 |
| LPE 20:3 | -0.111 | 0.527 | 0.038 | 0.828 | -0.014 | 0.937 | 0.137 | 0.431 | 0.049 | 0.780 | -0.215 | 0.215 |
| TUDCA | 0.105 | 0.548 | -0.077 | 0.659 | -0.141 | 0.420 | -0.080 | 0.647 | -0.006 | 0.974 | -0.124 | 0.477 |
| C12H16O6 | 0.092 | 0.601 | 0.152 | 0.383 | 0.076 | 0.663 | 0.289 | 0.092 | -0.151 | 0.386 | 0.073 | 0.678 |
| PC 38:7 | 0.208 | 0.231 | 0.341 | 0.045 | 0.258 | 0.134 | 0.258 | 0.134 | -0.043 | 0.808 | 0.092 | 0.598 |
| UDCA | -0.313 | 0.067 | -0.084 | 0.631 | -0.068 | 0.697 | -0.093 | 0.593 | -0.001 | 0.997 | 0.058 | 0.742 |
| C8H15NO2 | -0.172 | 0.323 | 0.146 | 0.401 | 0.056 | 0.748 | 0.234 | 0.177 | 0.121 | 0.488 | 0.162 | 0.353 |
| LPE 18:1 | -0.182 | 0.295 | 0.000 | 0.998 | -0.145 | 0.405 | -0.008 | 0.965 | -0.110 | 0.528 | -0.129 | 0.461 |
| 3-dimethoxyphenylpropanoic acid | -0.032 | 0.855 | -0.016 | 0.925 | 0.022 | 0.898 | -0.078 | 0.656 | 0.028 | 0.875 | -0.025 | 0.886 |

Spearman partial correlations between the sociability indexes and selected metabolites which were different between dysbiotic and non dysbiotic sAUD subjects. Correlations were adjusted for age, gender and body mass index. p<0.01 indicates a significant correlation. EI, emotional intelligence.
